# Supplementary material for: Simple aliphatic oximes as nonconventional luminogens with aggregation-induced emission characteristics
Source: Royal Society of Chemistry journal article supplement (doi:10.1039/c7tc00783c), 2017-01-01
Supplement: c7tc00783c1.pdf [file c7tc00783c1.pdf]

## Electronic Supplementary Information

### **Simple aliphatic oximes as nonconventional luminogens with aggregation-induced emission characteristics**

Qin Zhang, Qiuyun Mao, Cong Shang, Ya-Nan Chen, Xin Peng, Hongwei Tan and Huiliang Wang\*

Beijing Key Laboratory of Energy Conversion and Storage Materials, College of Chemistry, Beijing Normal University, Beijing 100875, P. R. China.

\*E-mail: wanghl@bnu.edu.cn

## Supporting Figures

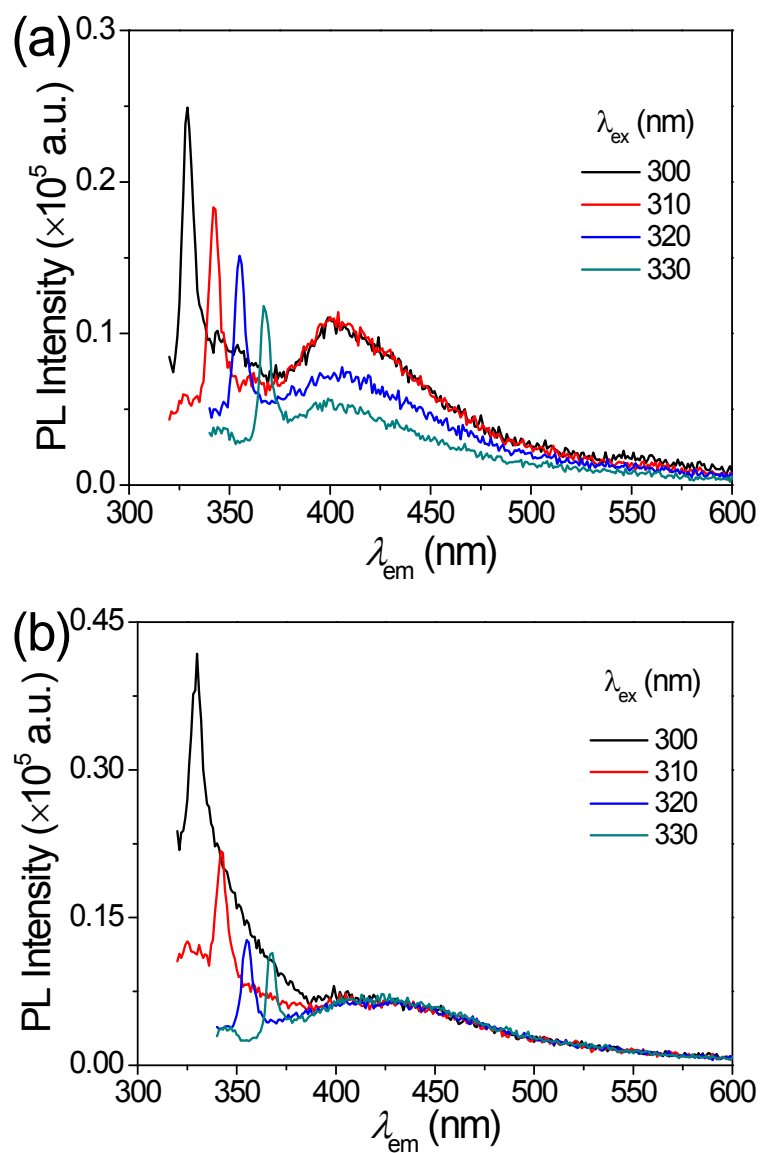

**Fig. S1.** Fluorescence emission spectra of HA (a) and EBA (b) in ethanol solutions (5 vol.%) under different excitation wavelengths.

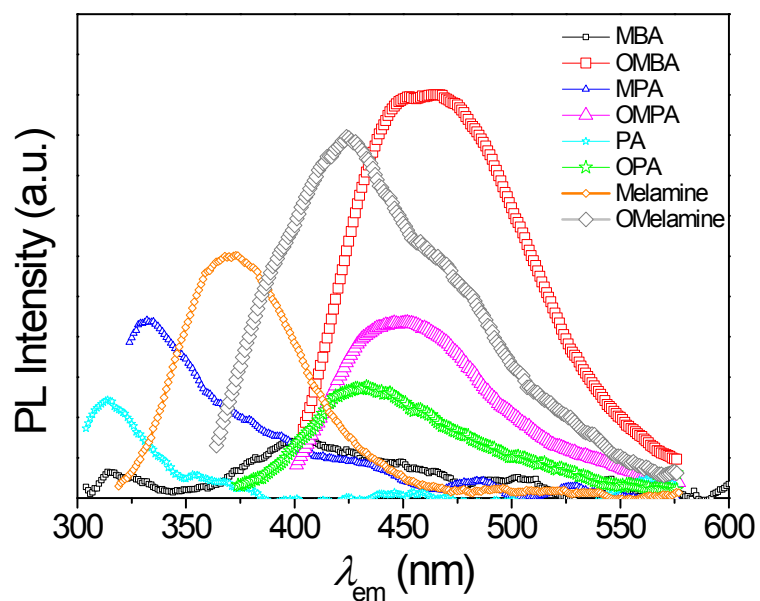

**Fig. S2.** Fluorescence emission spectra of the ethanol solutions of *N*-methylbutanamine (MBA) ( $0.3 \text{ mol L}^{-1}$ ), *N*-methylpentanamine (MPA) ( $0.7 \text{ mol L}^{-1}$ ) and propanamine (PA) ( $0.7 \text{ mol L}^{-1}$ ), melamine glycerol solution ( $0.1 \text{ mol L}^{-1}$ ) and their oxidized products.

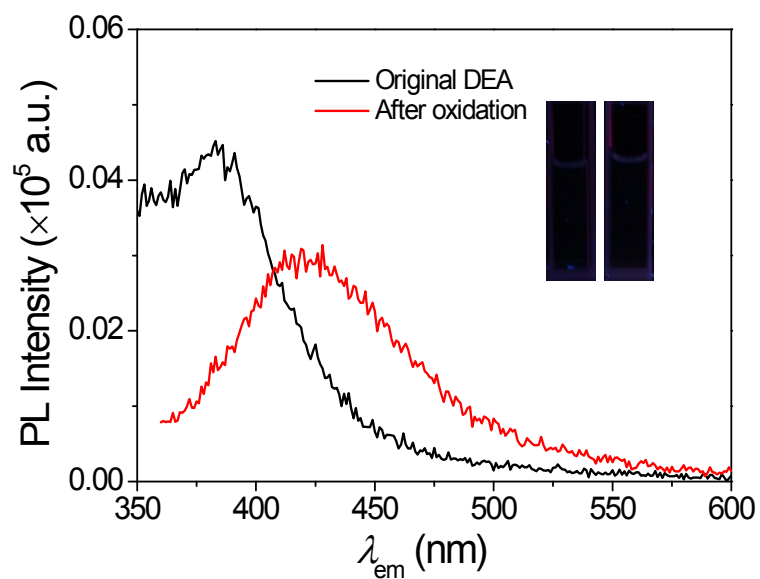

**Fig. S3.** Fluorescence emission spectra of *N,N*-diethylethanamine (DEA) and its product after reaction with  $\text{H}_2\text{O}_2$ . The insets show the photographs of the solutions of DEA before (left) and after the reaction (right) under UV light.

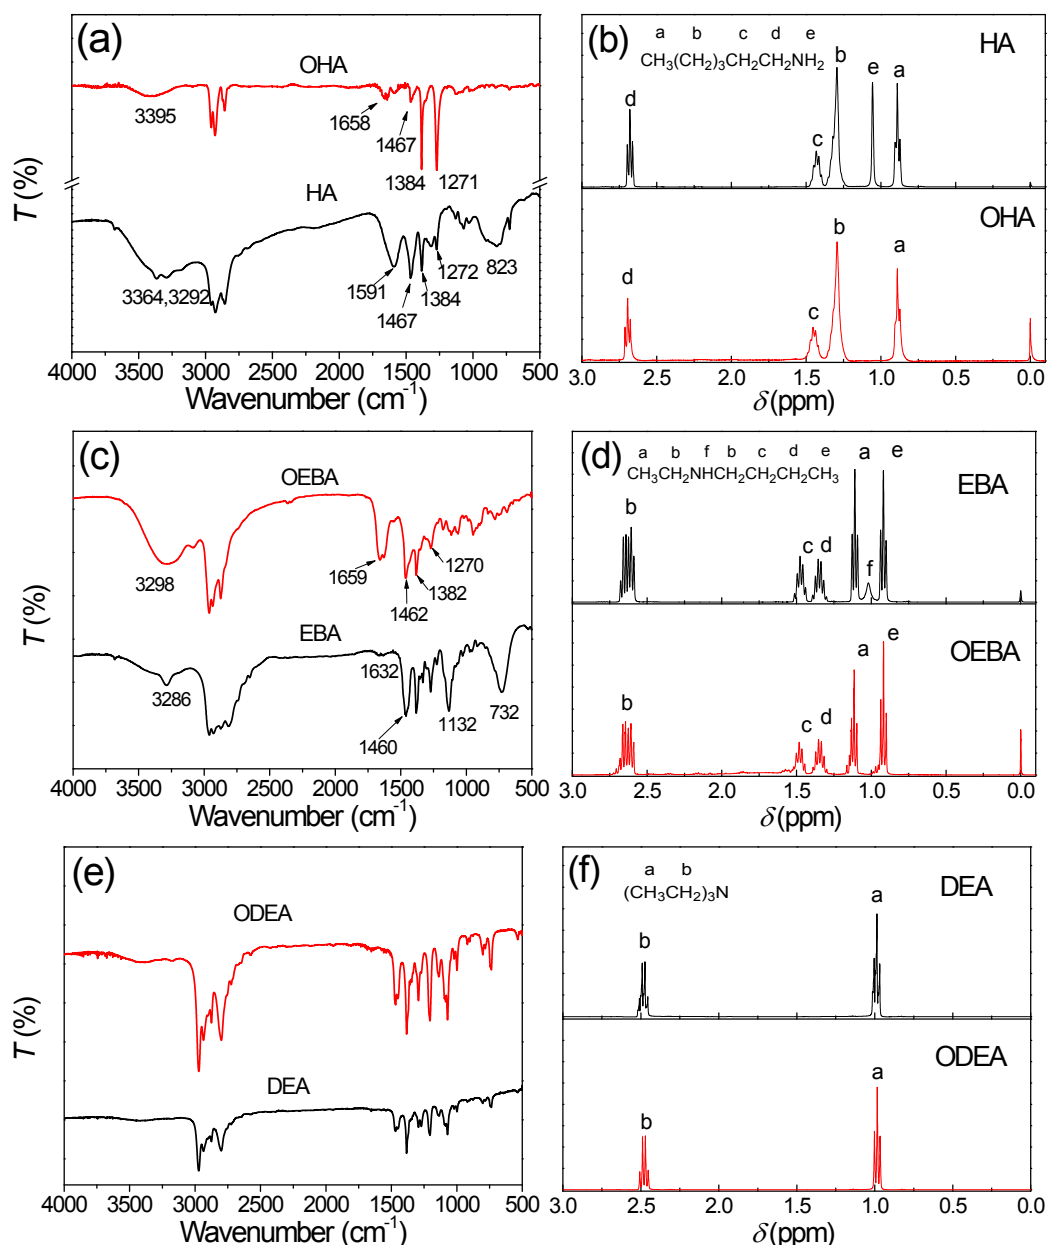

**Fig. S4.** FTIR spectra (a, c, e) and  $^1\text{H}$  NMR spectra (b, d, f) of HA, EBA and DEA as well as their products after reaction with  $\text{H}_2\text{O}_2$ . OHA, OEBA and ODEA represent the products of HA, EBA and DEA, respectively.

The FTIR spectrum of HA shows the characteristic  $-\text{NH}_2$  absorption bands at 3364, 3292, 1591 and  $832\text{ cm}^{-1}$  (Fig. S4a), and that of EBA shows the  $-\text{NH}-$  absorption bands at 3286, 1632 and  $732\text{ cm}^{-1}$  (Fig. S4c), respectively. These characteristic bands disappear in the spectra of the oxidized products (OHA and OEBA). Absorption bands of  $-\text{OH}$  group are found at 3395 and  $3298\text{ cm}^{-1}$  for OHA and OEBA, respectively (Fig. S4a, c). Fig. 4b and 4d show that the chemical shifts corresponding to the H in  $-\text{NH}_2$  or  $-\text{NH}-$  appear at 1.03 ppm in the  $^1\text{H}$ NMR spectra of both HA and EBA, but they disappear in the spectra of OHA and OEBA. While for the tertiary amine DEA, no obvious changes are found in the FTIR and  $^1\text{H}$ NMR spectra of the oxidized product (ODEA) with comparison to those of the original DEA (Fig. S4e, f).

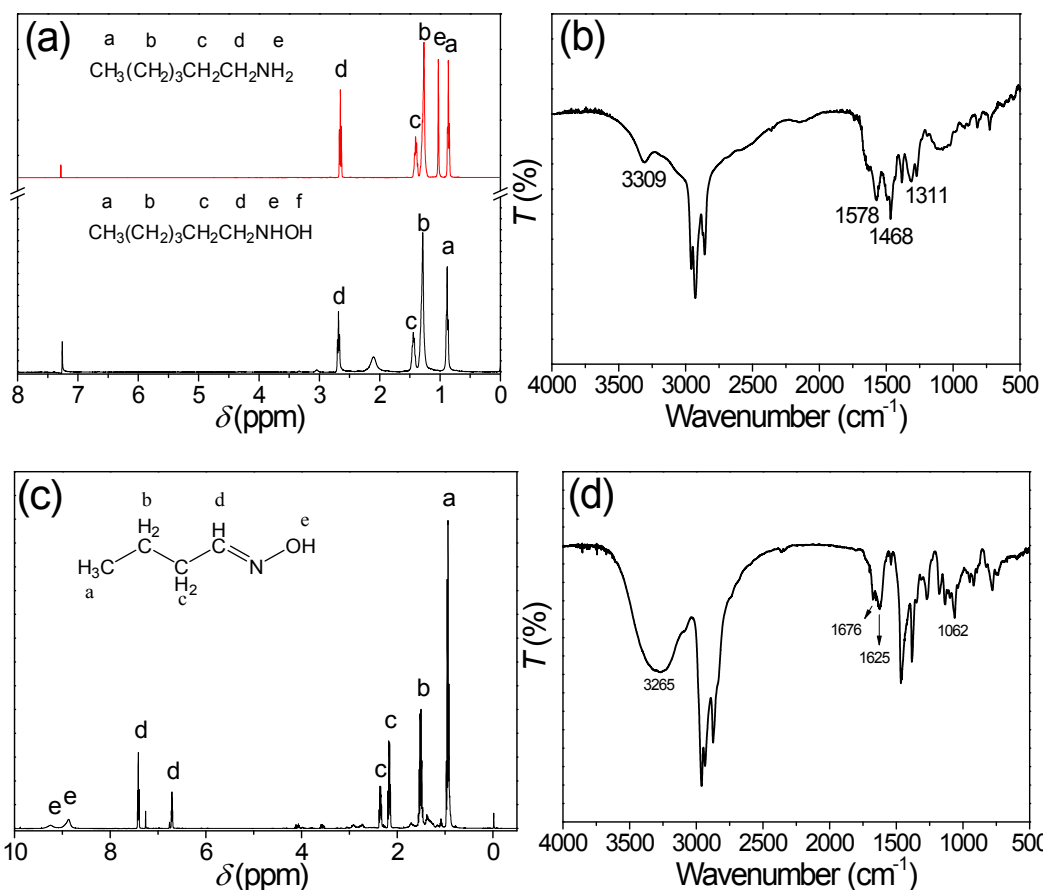

**Fig. S5.**  $^1\text{H NMR}$  spectra and FTIR spectra of *N*-hexylhydroxylamine (a, b) and butanal oxime (c, d).

Chemical shifts of the H atoms in HA and *N*-hexylhydroxylamine are as follows:  $^1\text{H NMR}$  (400MHz, TMS,  $\text{CDCl}_3$ ): HA:  $\delta$  0.82-0.85 (3H, t), 1.01 (2H, s), 1.24-1.30 (6H, m), 1.35-1.40 (2H, m), 2.61-2.65 (2H, t); *N*-hexylhydroxylamine: 0.87-0.88 (3H, t), 1.29 (6H, m), 1.43-1.44 (2H, m), 2.67-2.70 (2H, t).

The  $^1\text{H NMR}$  and FTIR spectra of butanal oxime are shown in Figure S5c,d.  $^1\text{H NMR}$  (400MHz, TMS,  $\text{CDCl}_3$ ):  $\delta$  8.87 and 9.25 (1H, s), 7.41 and 6.71 (1H, t), 2.36 and 2.17 (2H, q), 1.50-1.56 (2H, m), 0.92-0.97 (3H, m). FTIR spectrum shows the characteristic  $-\text{OH}$  absorption band at 3265  $\text{cm}^{-1}$  and the  $\text{C}=\text{N}$  absorption band at 1676  $\text{cm}^{-1}$  (Figure S5d).

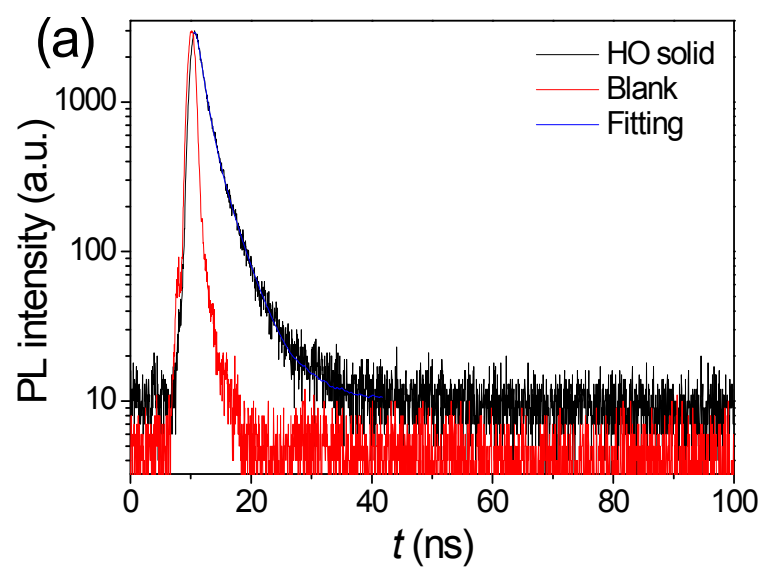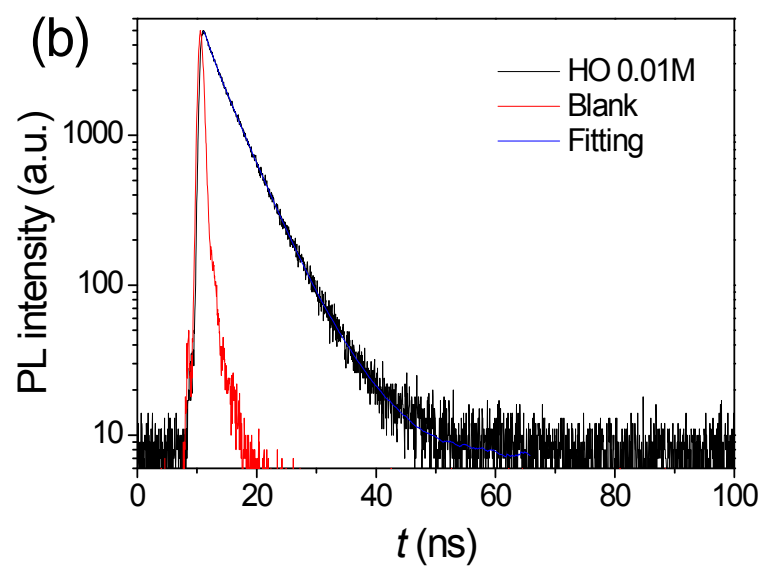

**Fig. S6.** Fluorescence lifetime measurements of hexanal oxime in both solid state and in an ethanol solution (0.01 M).

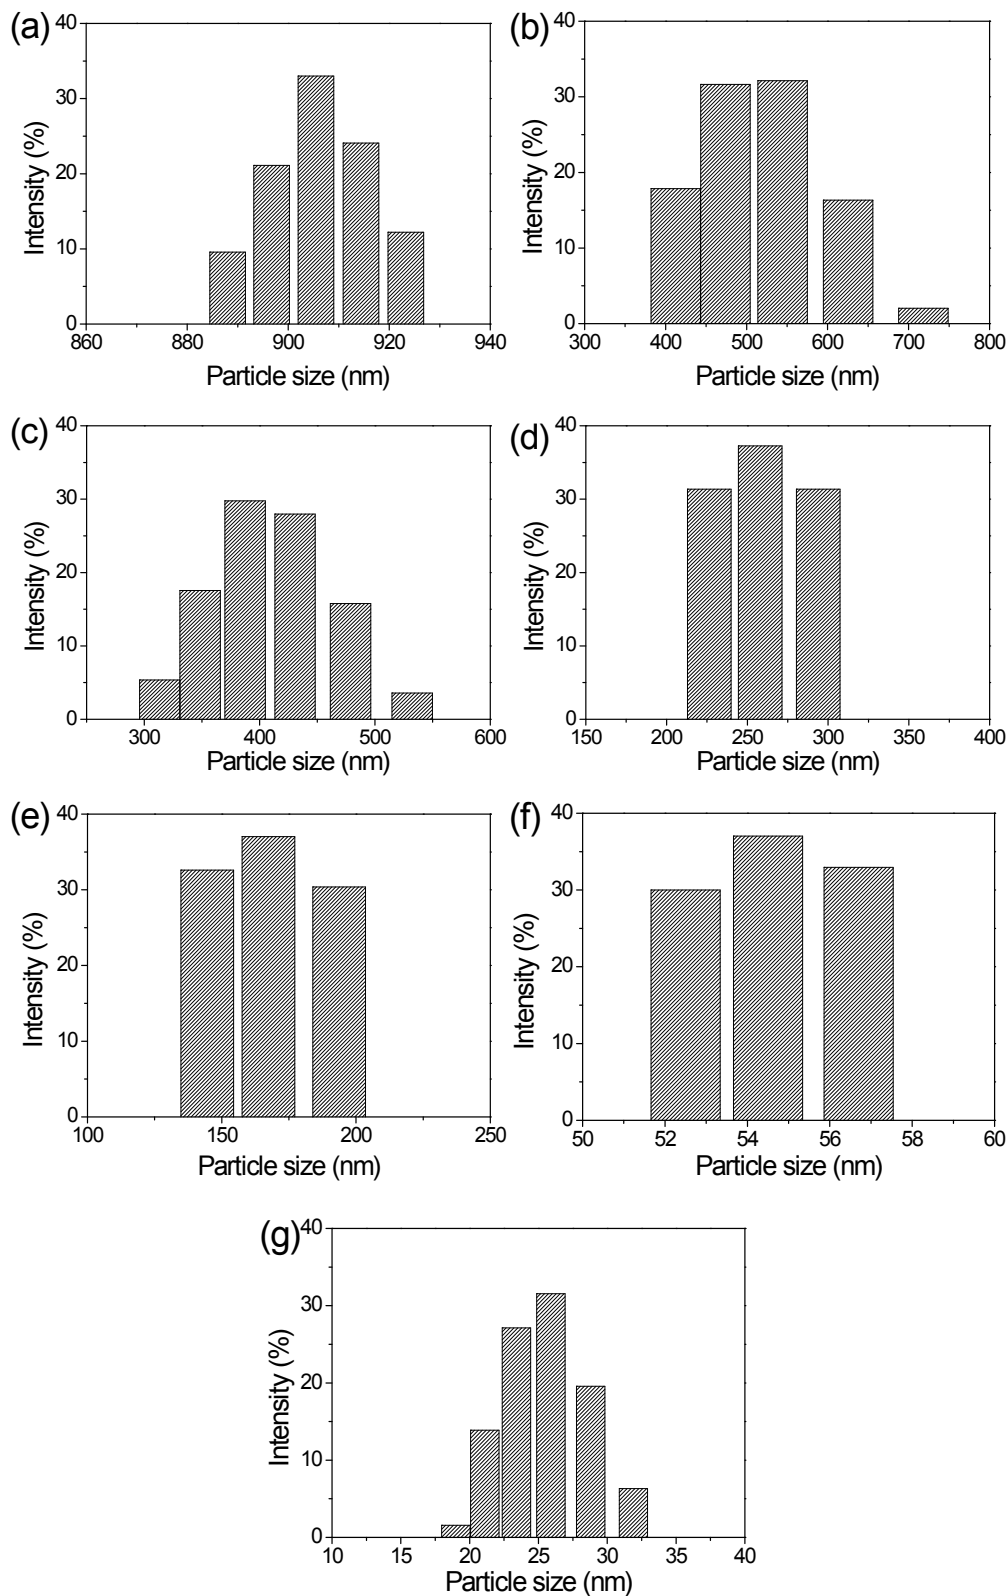

**Fig. S7.** Particle size distributions of hexanal oxime in ethanol solutions with the hexanal oxime concentration of 0.02 M (a), 0.01 M (b),  $5 \times 10^{-3}$  M (c),  $2.5 \times 10^{-3}$  M (d),  $1.25 \times 10^{-3}$  M (e),  $1.25 \times 10^{-4}$  M (f) and  $1.25 \times 10^{-5}$  M (g).

**Table S1.** Crystallographic data of hexanal oxime single crystals.

|                       |                                    |                                                 |                |
|-----------------------|------------------------------------|-------------------------------------------------|----------------|
| <b>Formula</b>        | C <sub>6</sub> H <sub>13</sub> NO  | <b>V(Å<sup>3</sup>)</b>                         | 708.14         |
| <b>Formula weight</b> | 115.17                             | <b>Z</b>                                        | 4              |
| <b>Radiation</b>      | Cu Kα                              | <b>ρ<sub>calc</sub> g/cm<sup>3</sup></b>        | 1.080          |
| <b>Crystal system</b> | Monoclinic                         | <b>Absorption coefficient (mm<sup>-1</sup>)</b> | 0.579          |
| <b>Space group</b>    | <i>P</i> 2 <sub>1</sub> / <i>c</i> | <b>F (0 0 0)</b>                                | 256.0          |
| <b>a(Å)</b>           | 5.55642(18)                        | <b>Goodness-of-fit</b>                          | 1.061          |
| <b>b(Å)</b>           | 4.79489(14)                        | <b>R<sub>1</sub>, R<sub>w</sub></b>             | 0.0357, 0.0962 |
| <b>c(Å)</b>           | 26.6236(9)                         | <b>Temperature(K)</b>                           | 100.00         |
| <b>α(°)</b>           | 90                                 | <b>CCDC</b>                                     | 1533695        |
| <b>β(°)</b>           | 93.307(3)                          |                                                 |                |
| <b>γ(°)</b>           | 90                                 |                                                 |                |
